# Supplementary material
Source: PubMed Central journal article supplement (PMC6643566)
Supplement: ao7b00228_si_001.pdf [file ao7b00228_si_001.pdf]

# Supporting Information

## Singlet Oxygen Generation with Chemical Excitation of an Erythro-sine-Luminol Conjugate

Nisa Yesilgul,<sup>†</sup>T. Bilal Uyar,<sup>‡</sup>Ozlem Seven,<sup>‡</sup> Engin U. Akkaya<sup>\*,†,‡</sup>

<sup>†</sup> Department of Chemistry, Bilkent University, 06800, Ankara (Turkey)

<sup>‡</sup> UNAM-National Nanotechnology Research Center, Bilkent University, 06800, Ankara (Turkey)

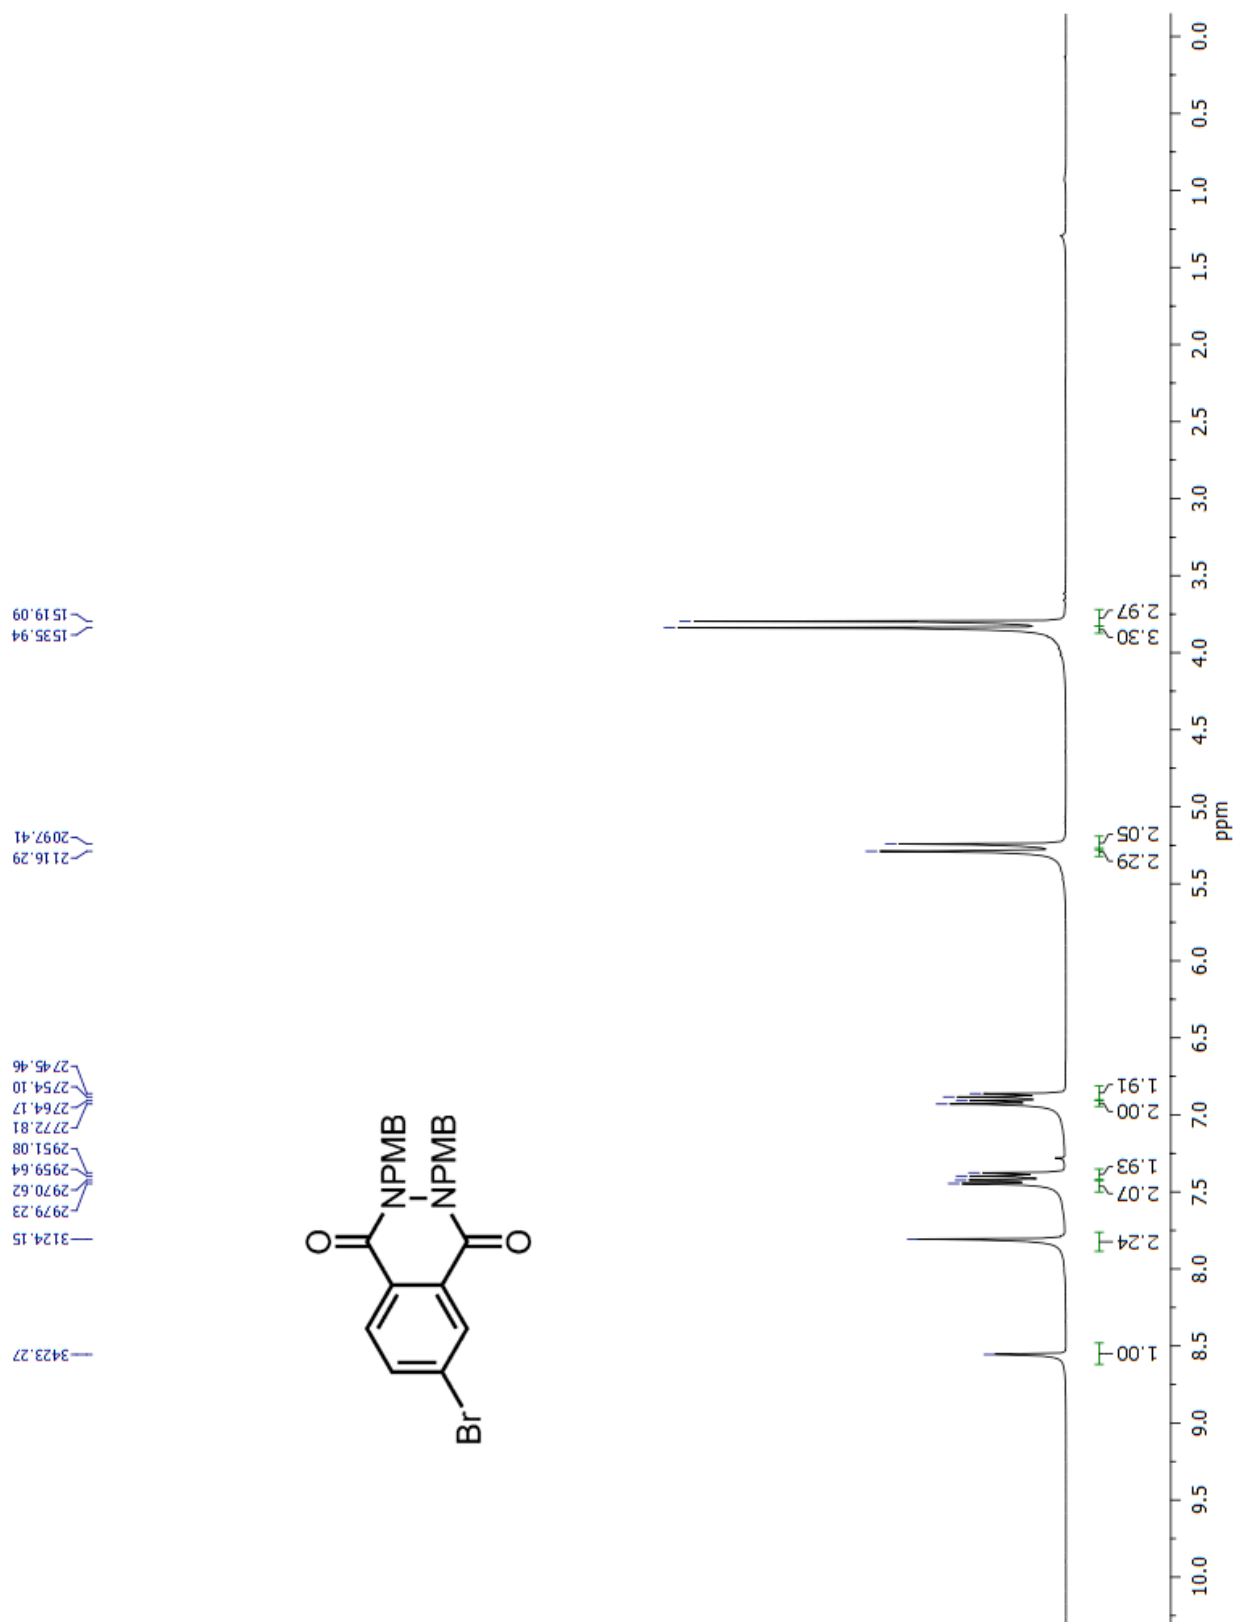

**Figure S1.** <sup>1</sup>H NMR Spectrum of Compound 3

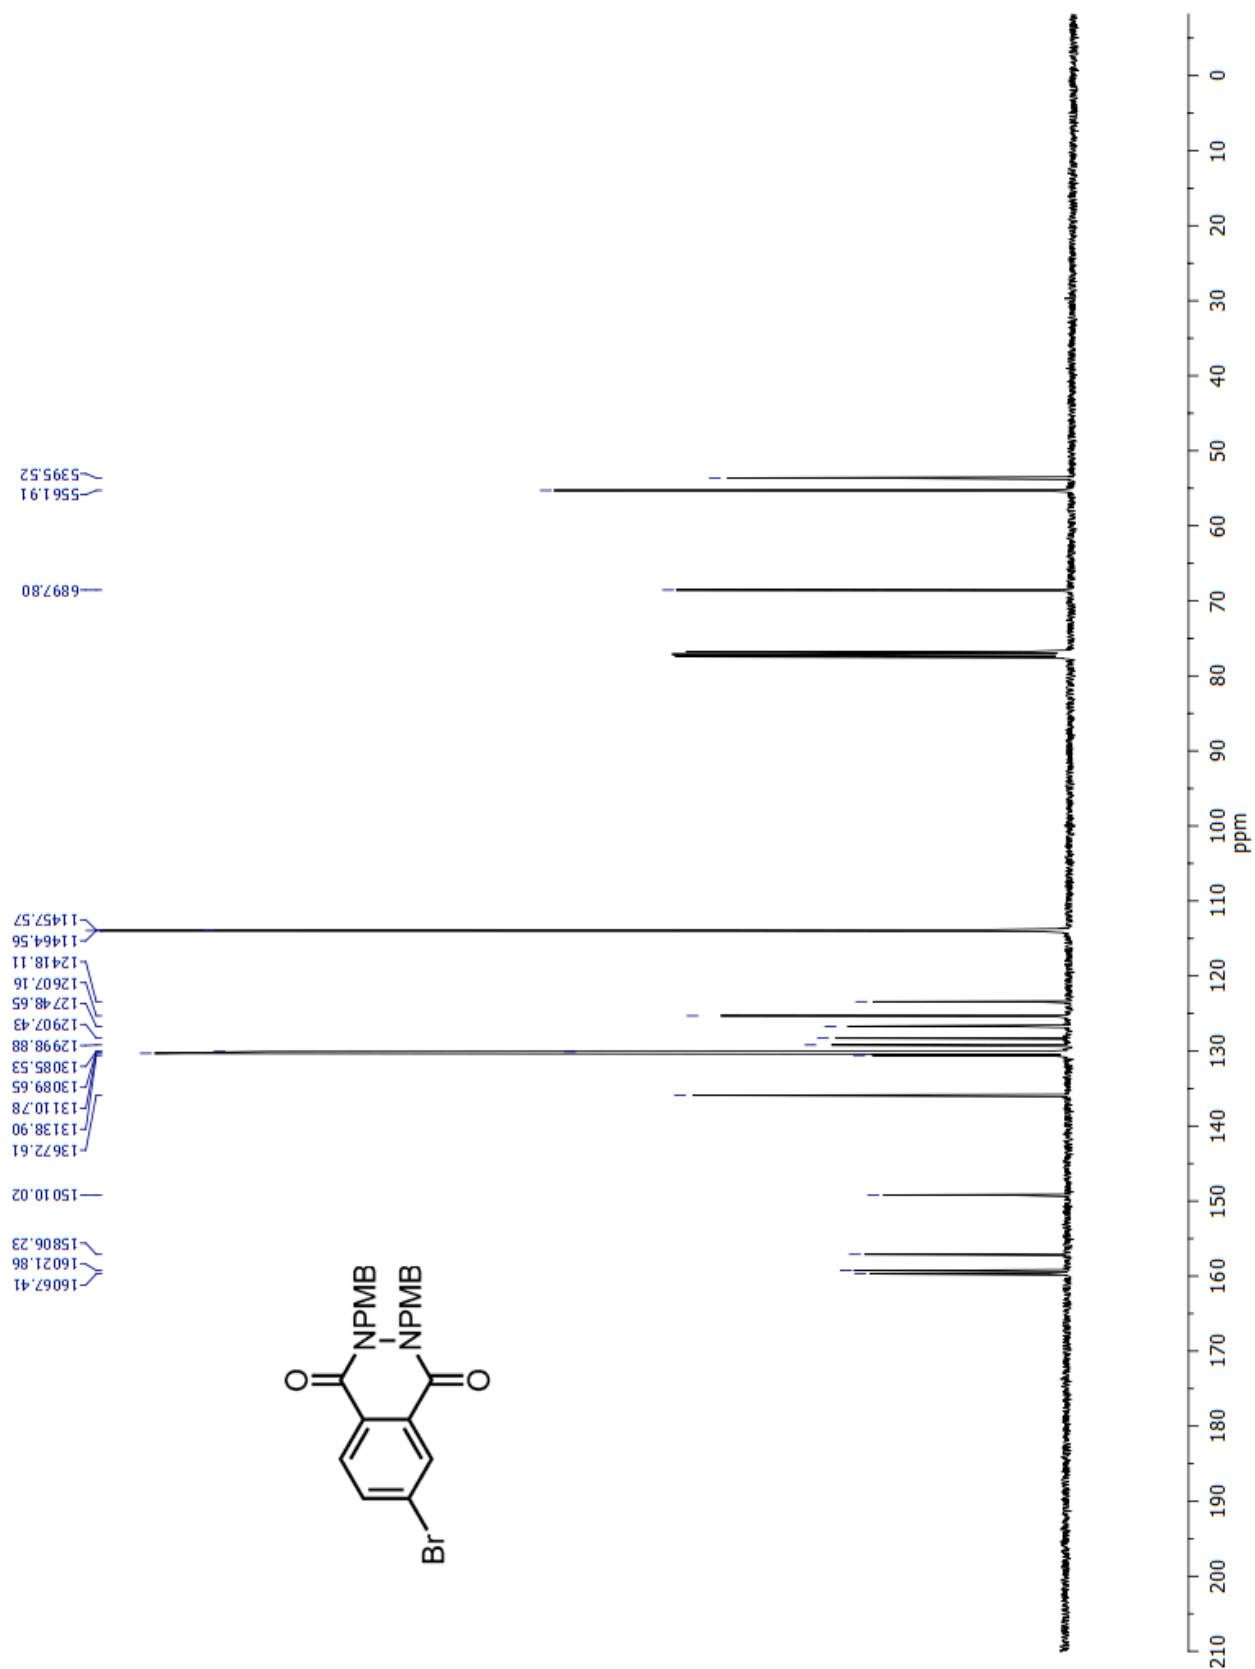

Figure S2.  $^{13}\text{C}$  NMR Spectrum of Compound 3

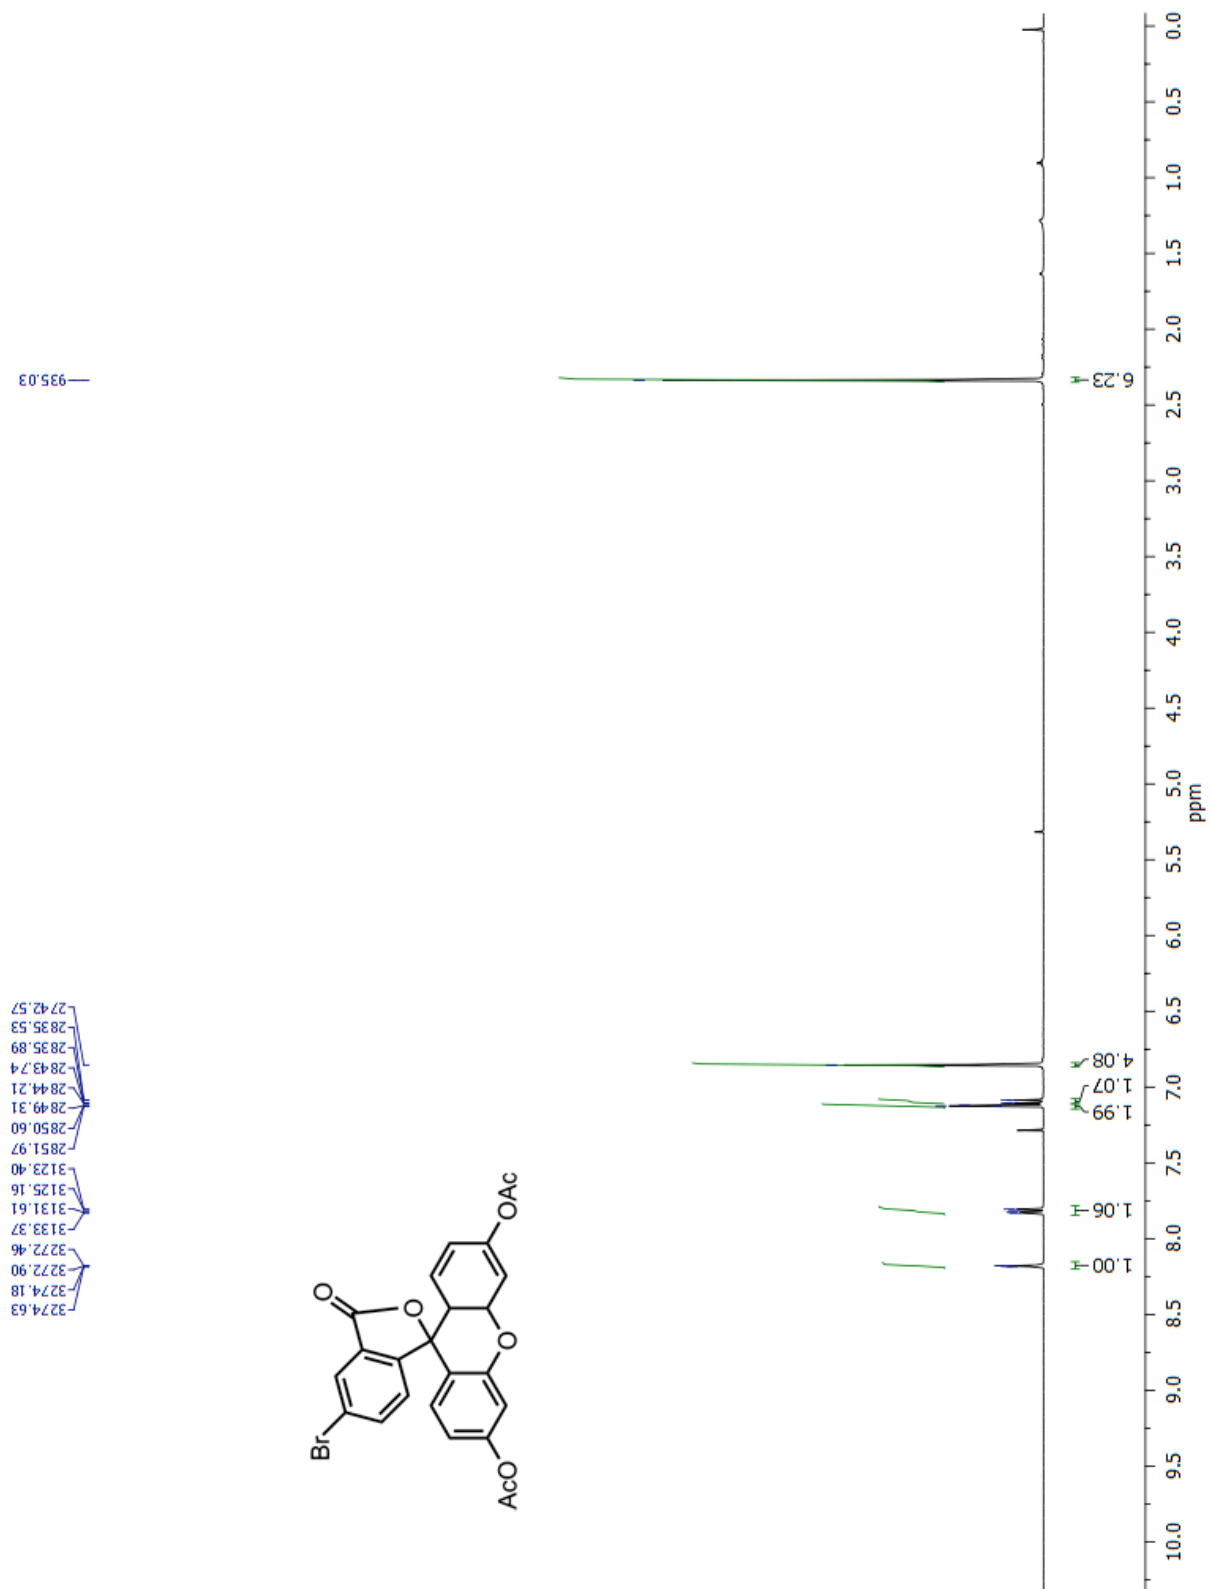

**Figure S3.** <sup>1</sup>H NMR Spectrum of Compound 6

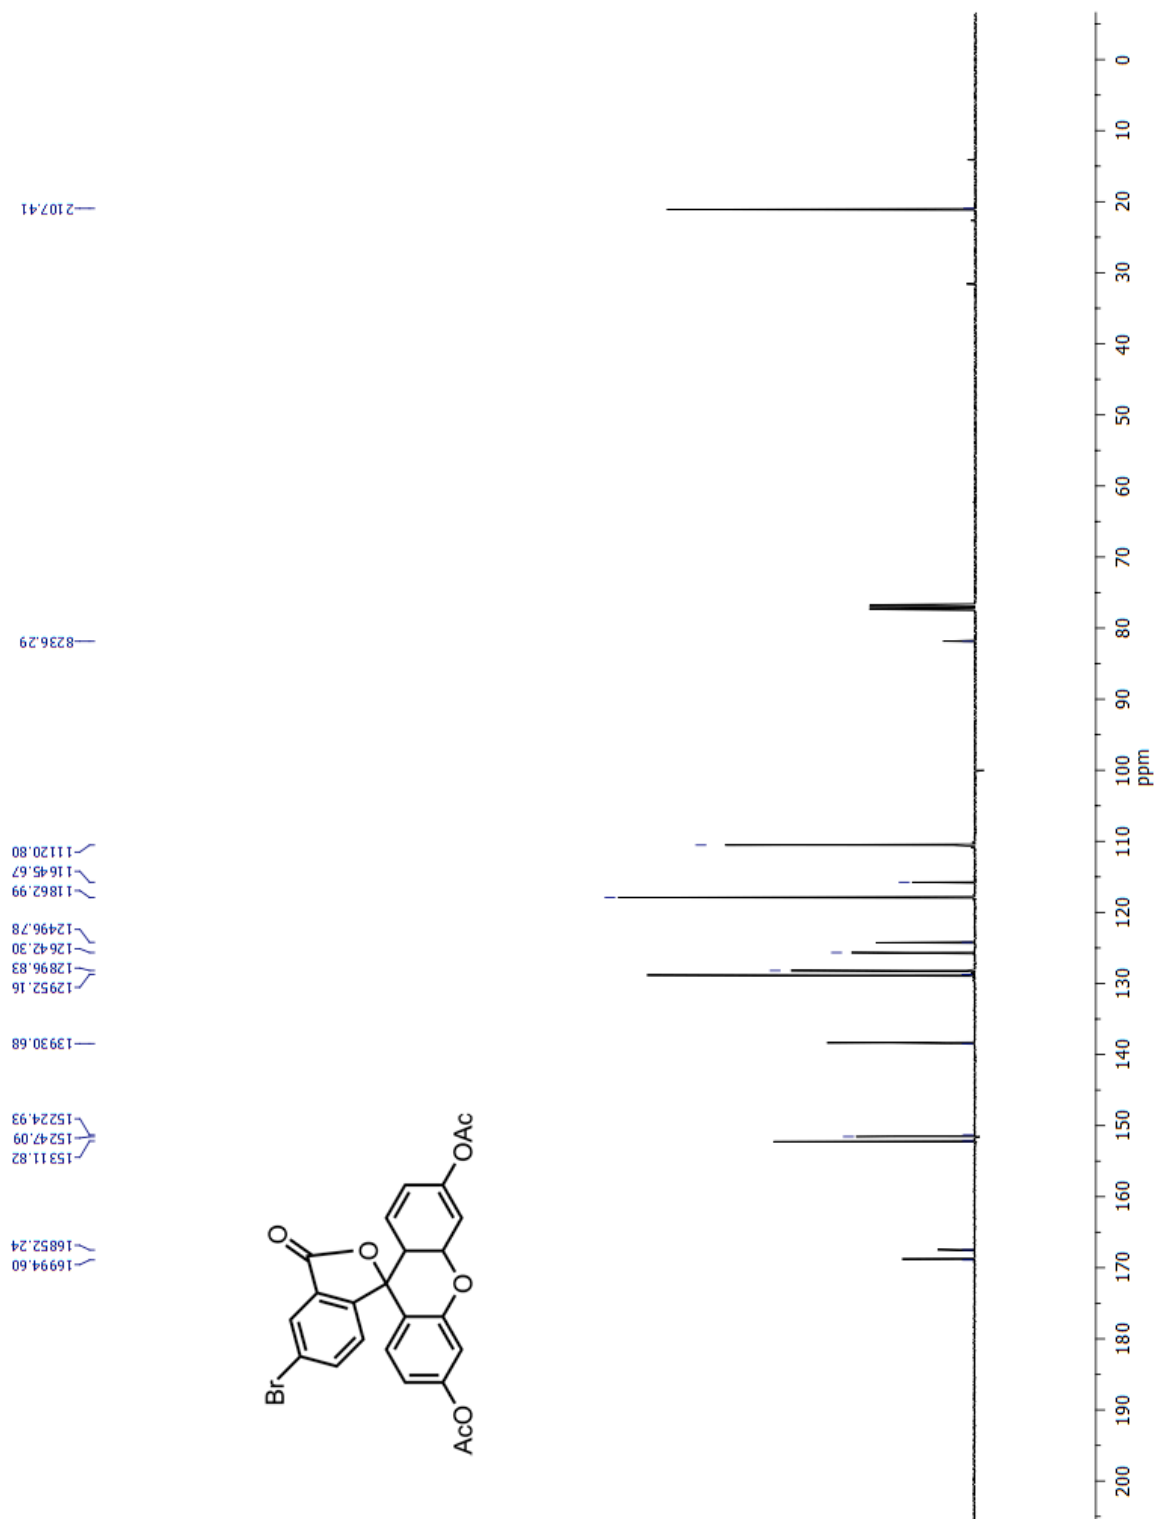

**Figure S4.**  $^{13}\text{C}$  NMR Spectrum of Compound 6

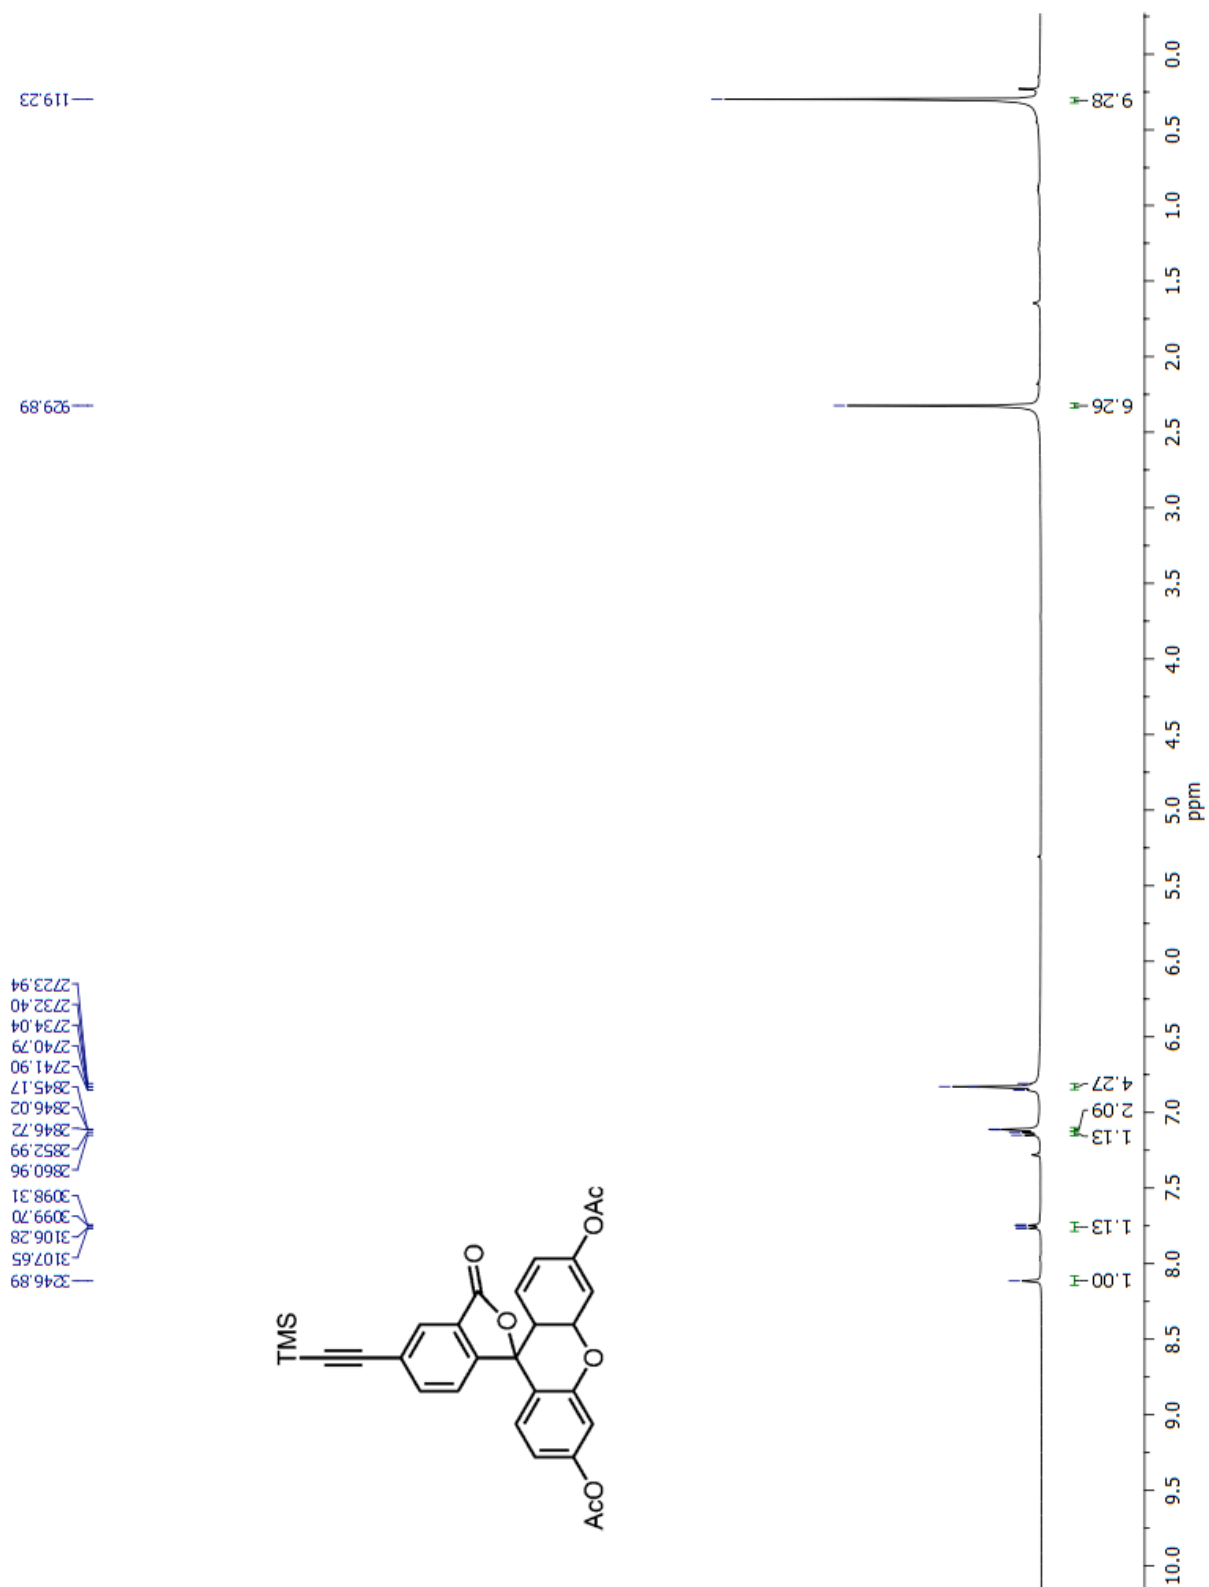

Figure S5. <sup>1</sup>H NMR Spectrum of Compound 7

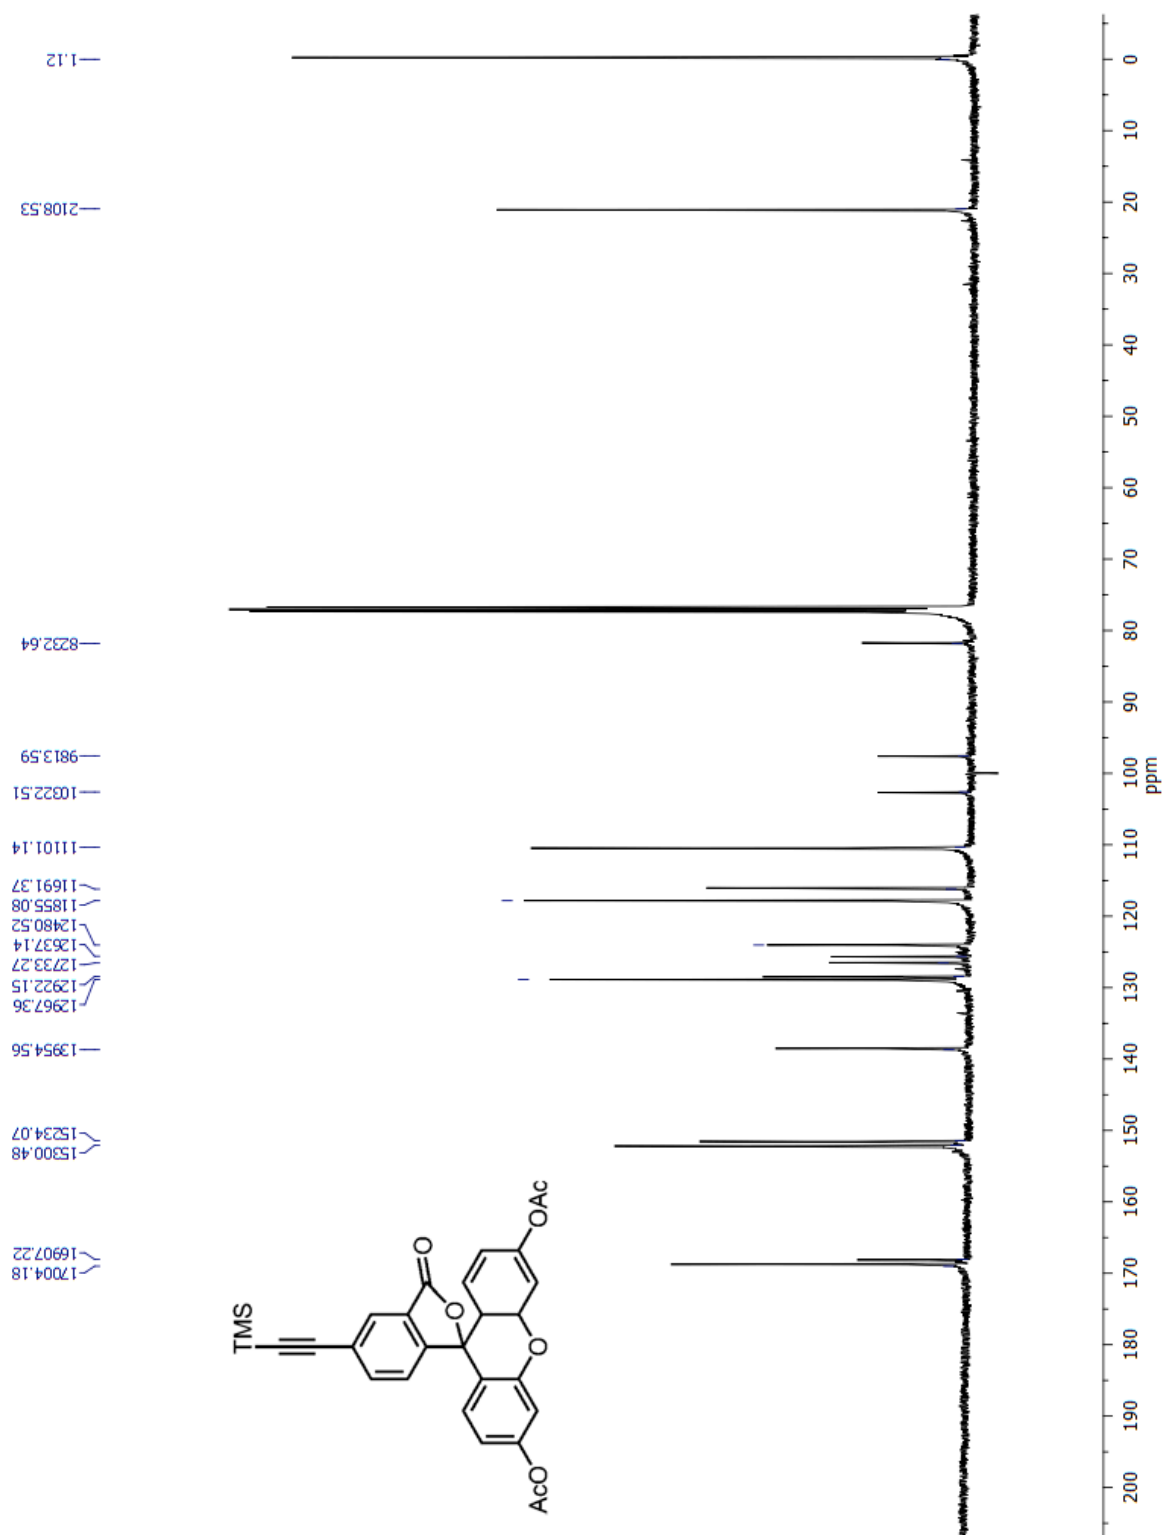

**Figure S6.**  $^{13}\text{C}$  NMR Spectrum of Compound 7

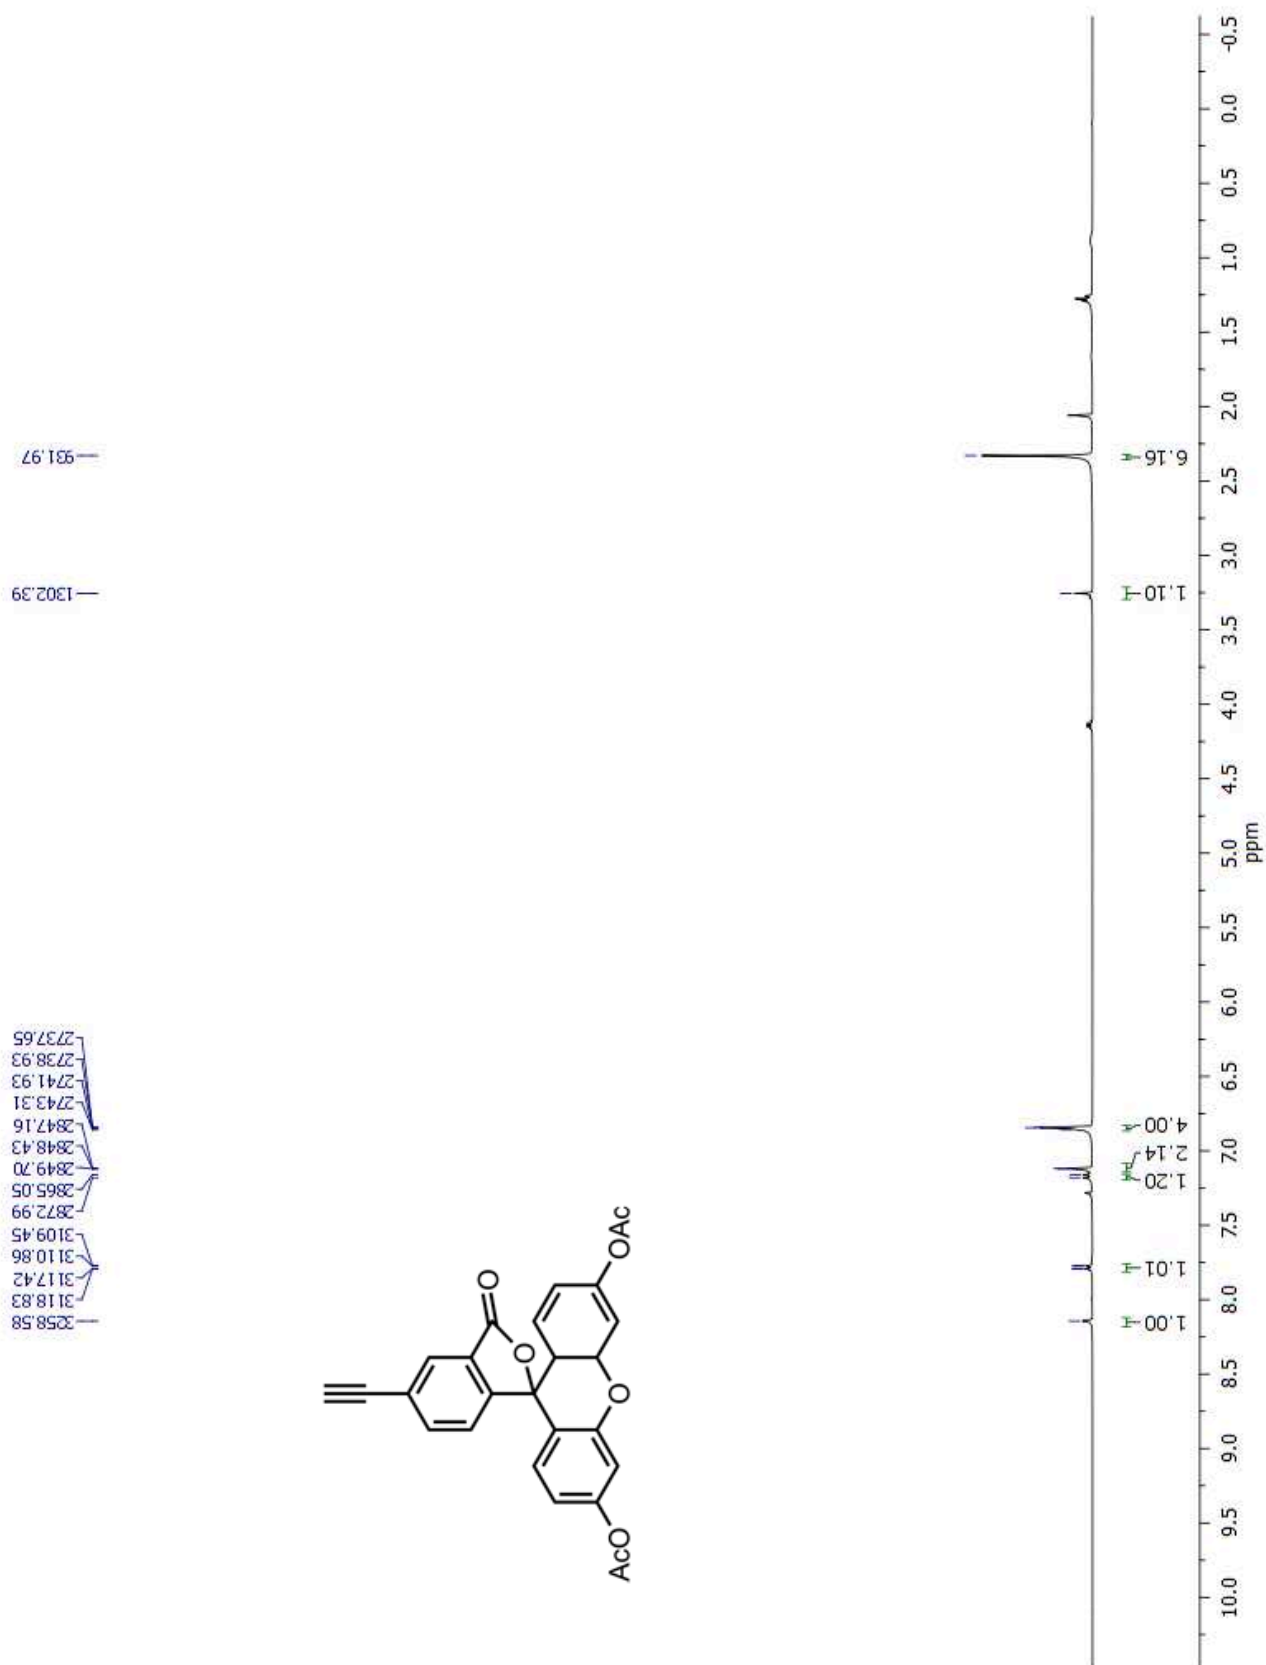

Figure S7. <sup>1</sup>H NMR Spectrum of Compound 8



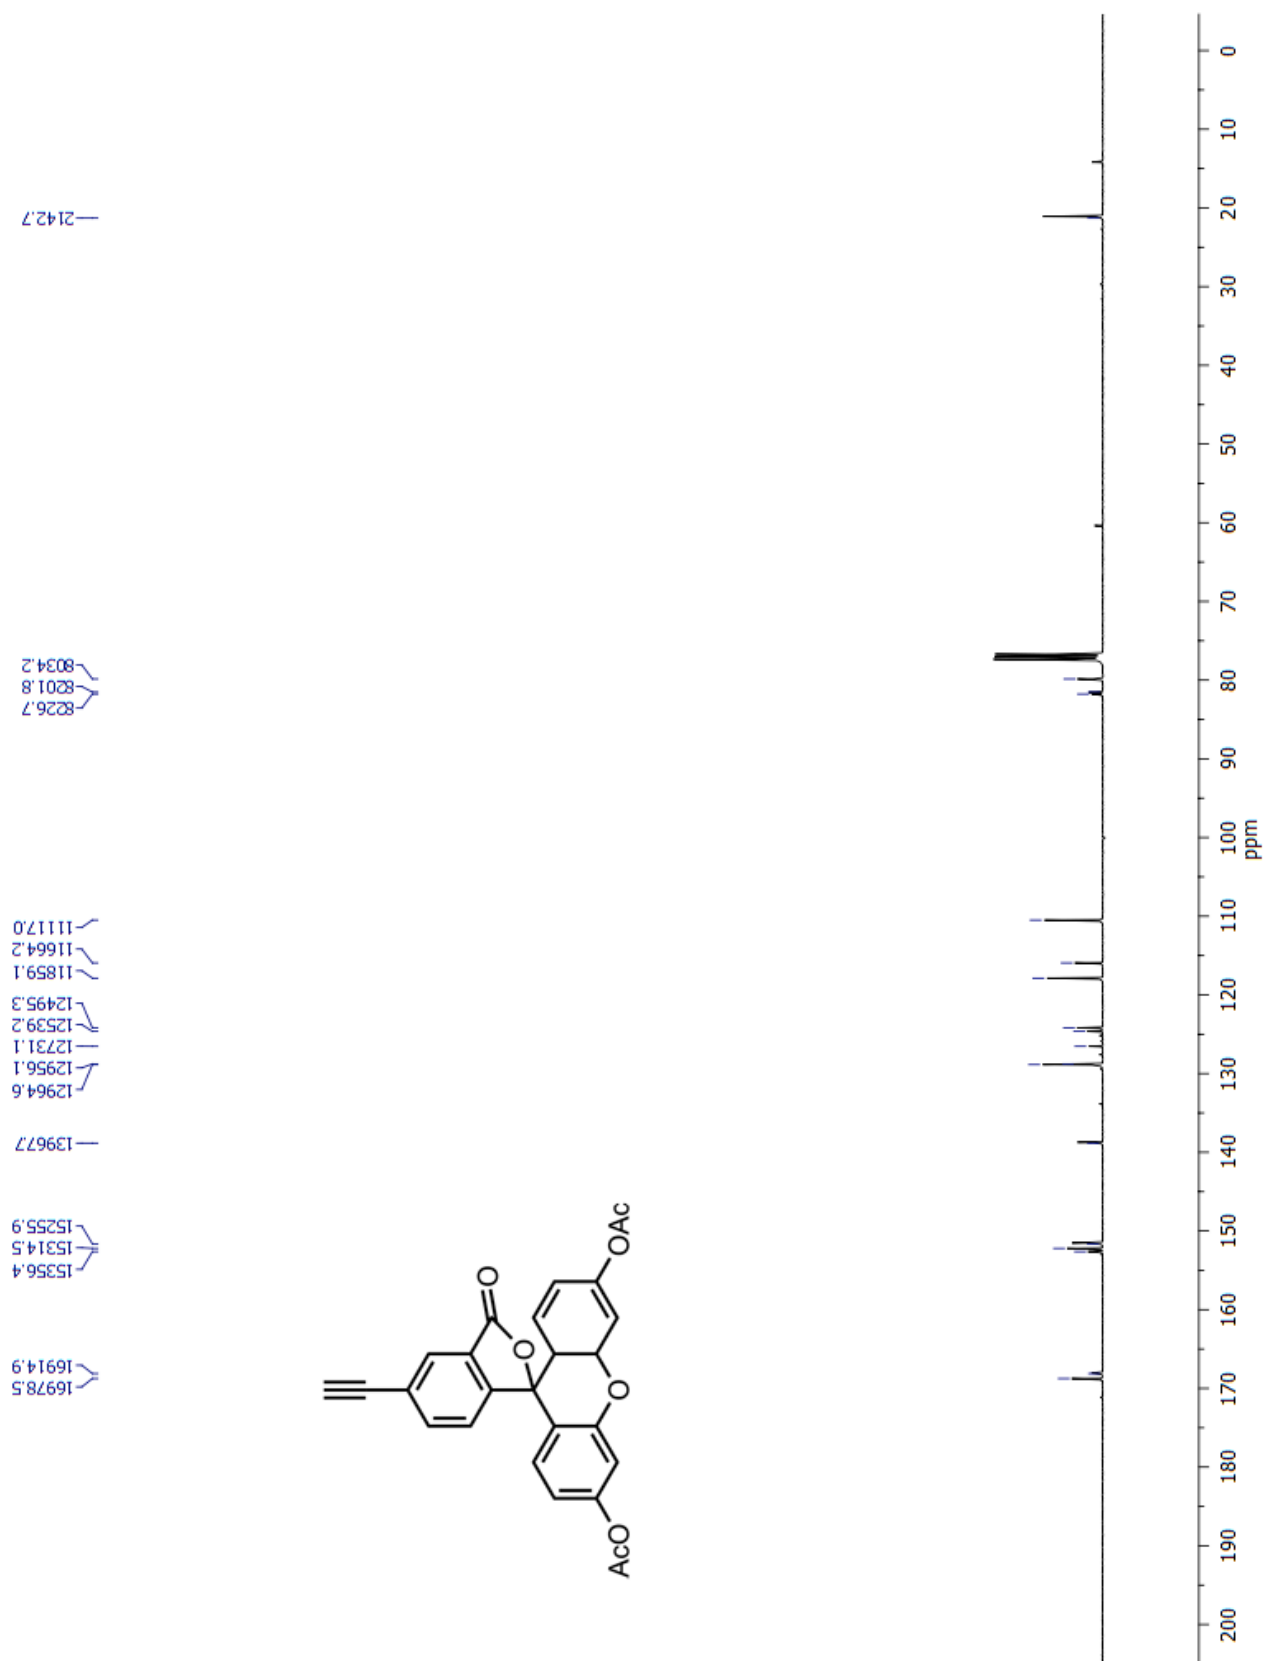

**Figure S8.**  $^{13}\text{C}$  NMR Spectrum of Compound **8**

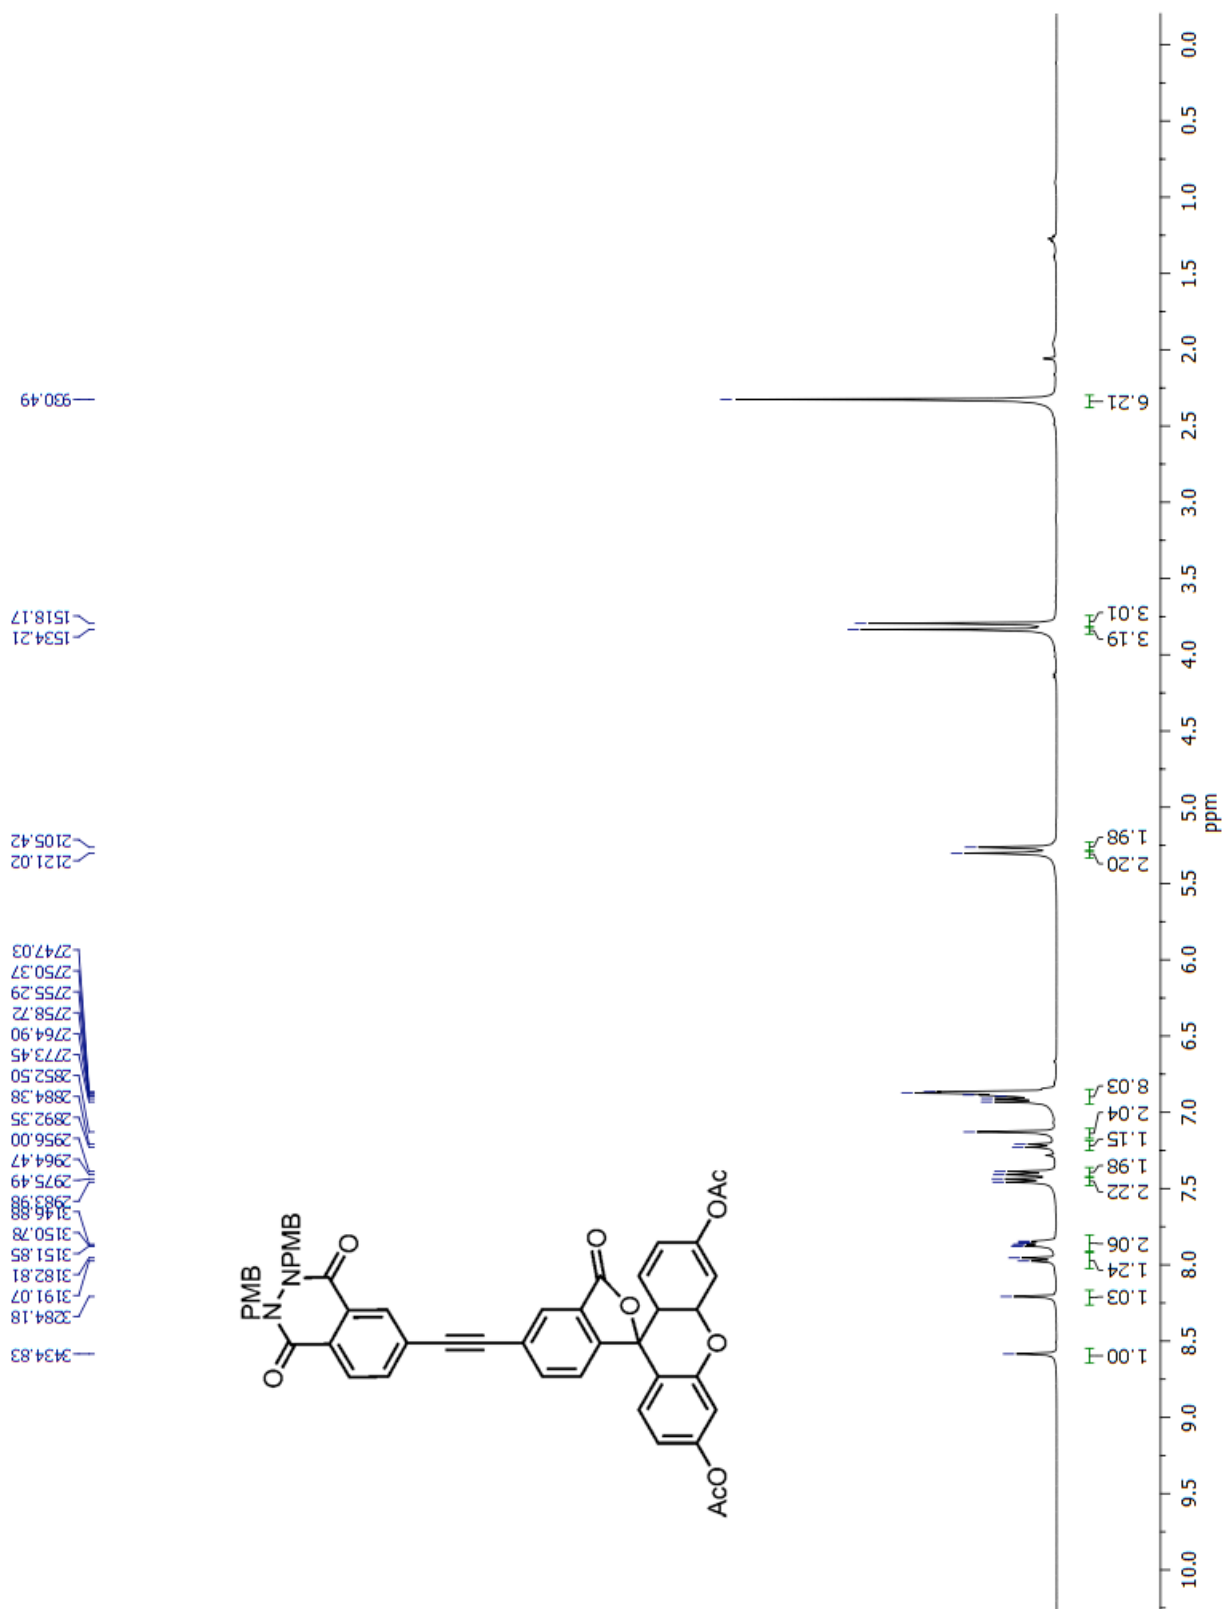

Figure S9.  $^1\text{H}$  NMR Spectrum of Compound 9

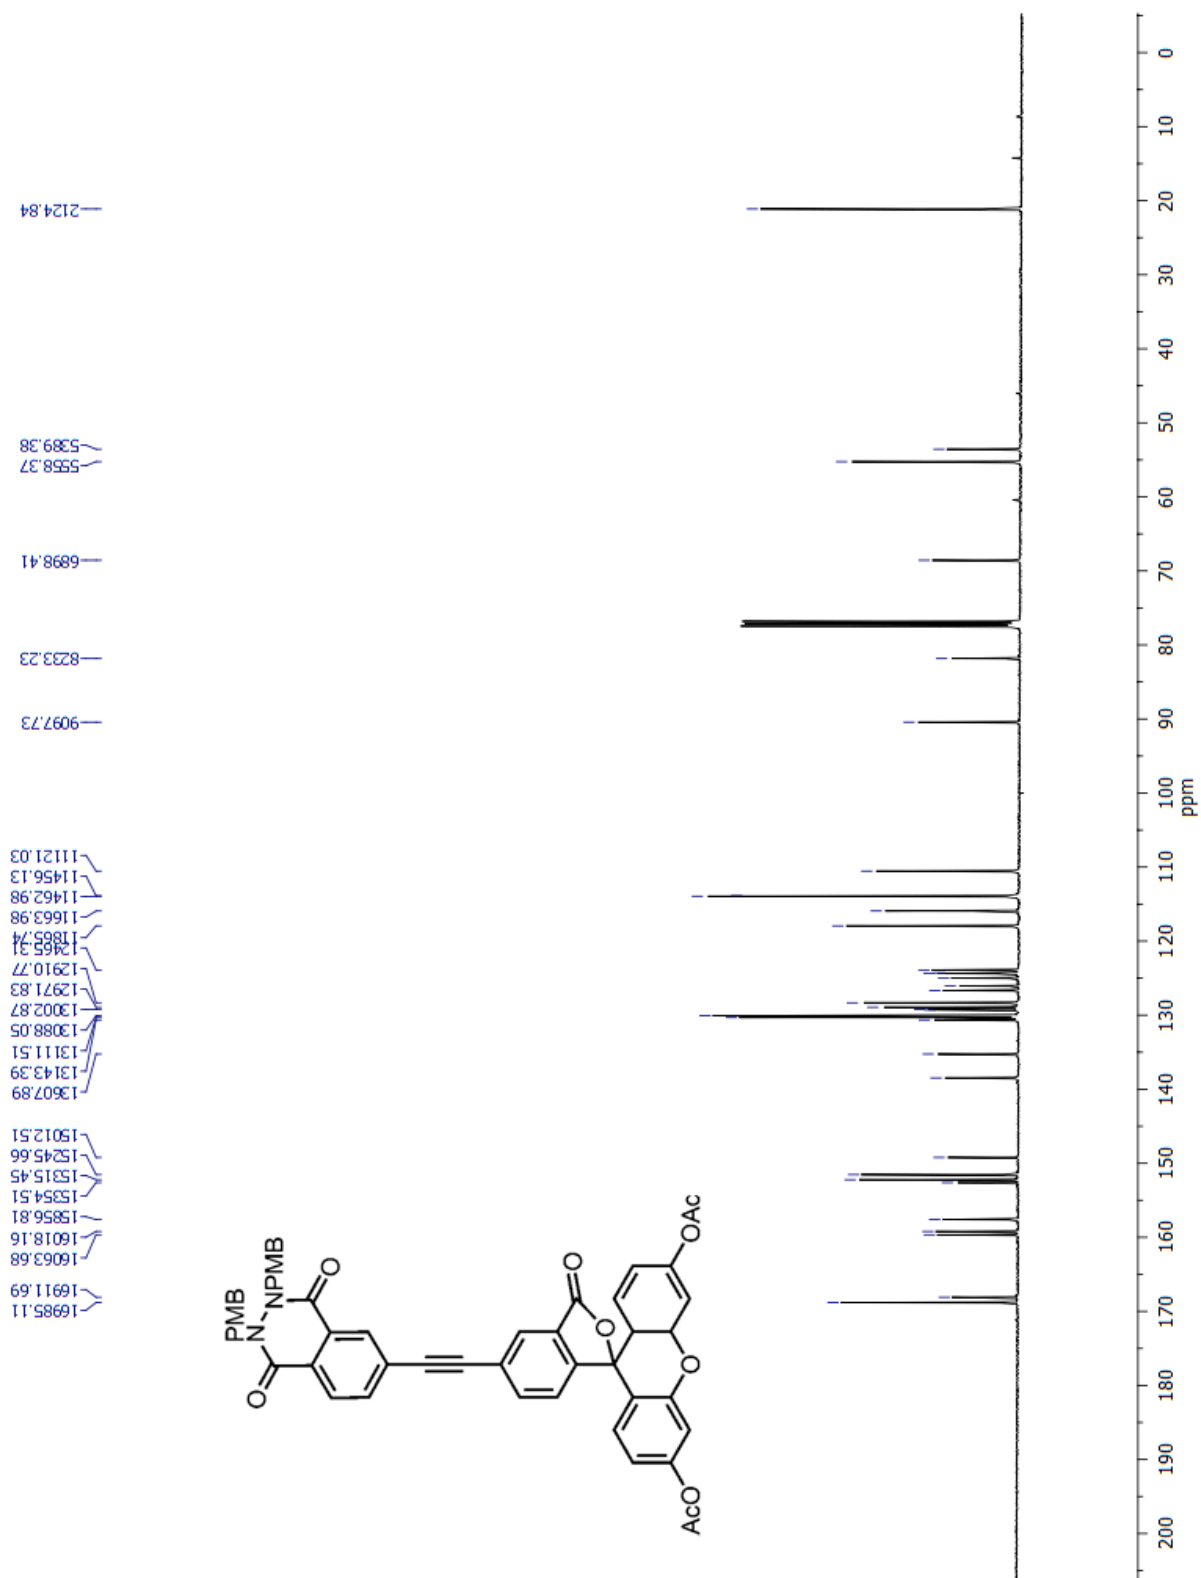

**Figure S10.**  $^{13}\text{C}$  NMR Spectrum of Compound 9

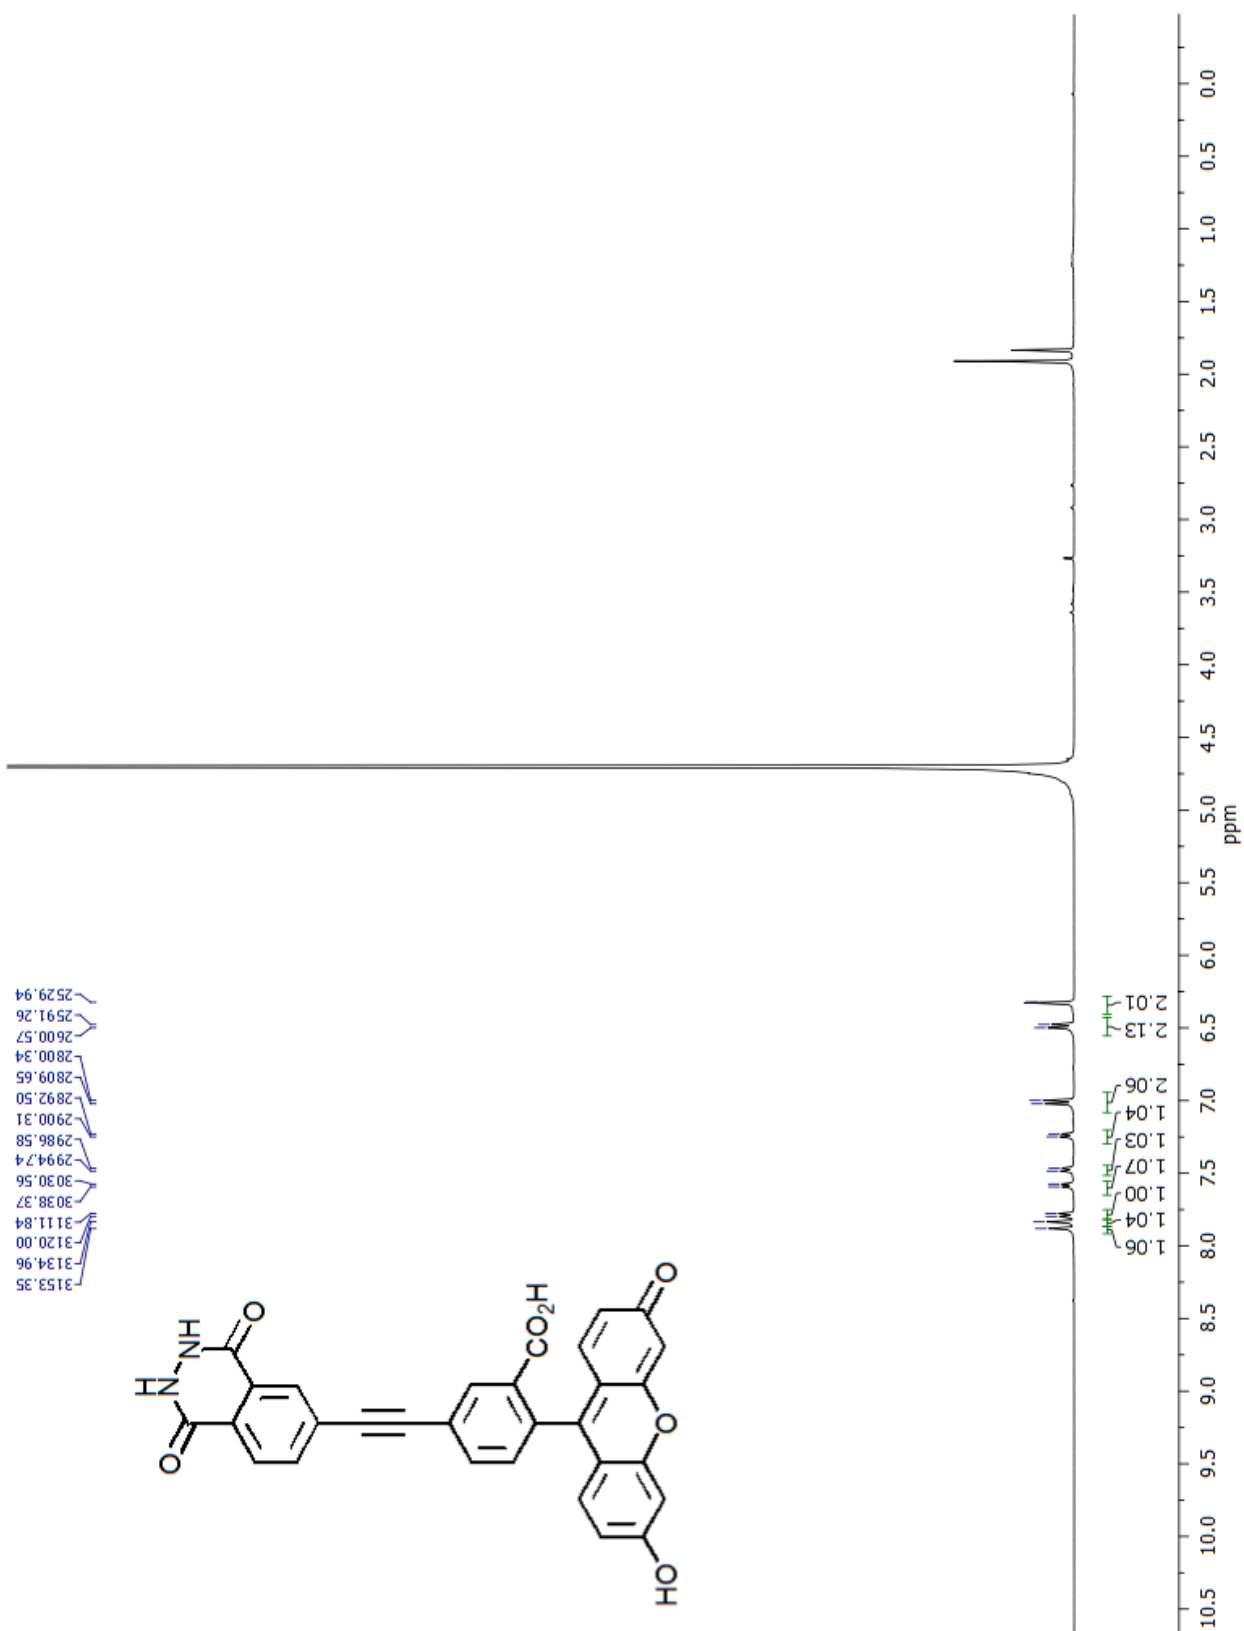

**Figure S11.**  $^1\text{H}$  NMR Spectrum of Compound 10

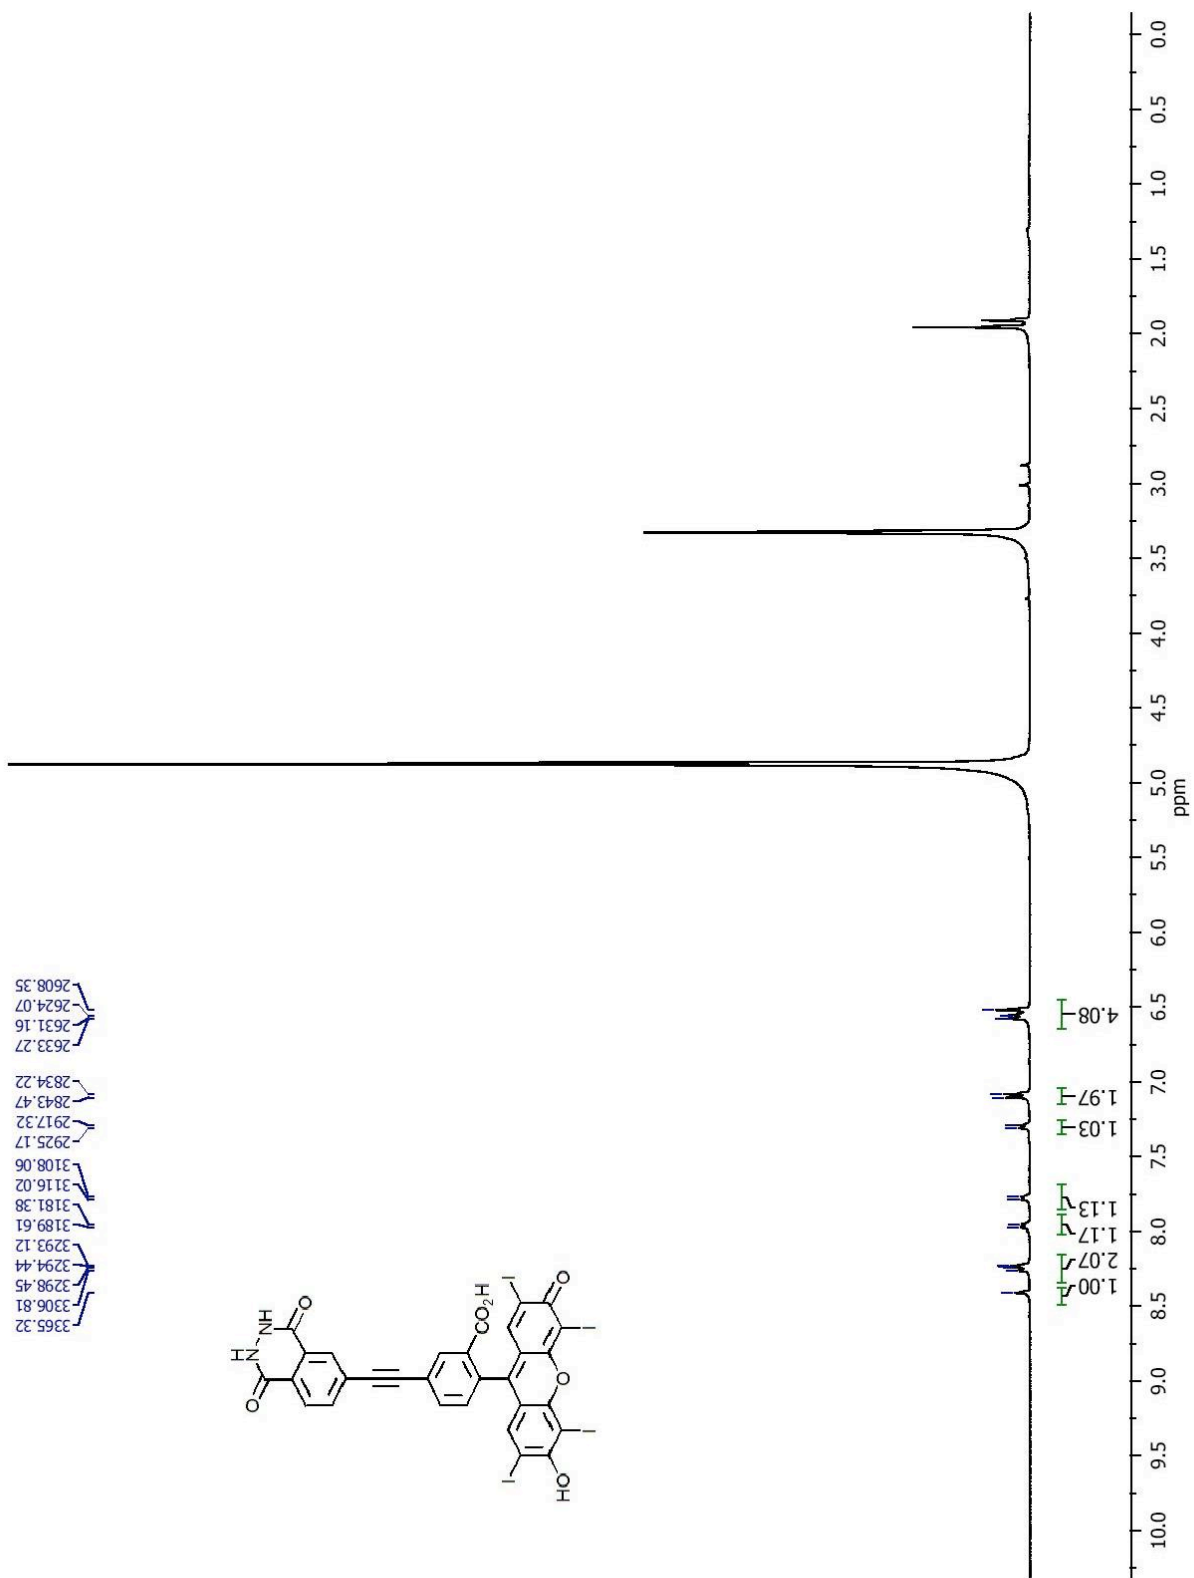

Figure S12.  $^1\text{H}$  NMR Spectrum of Compound 11

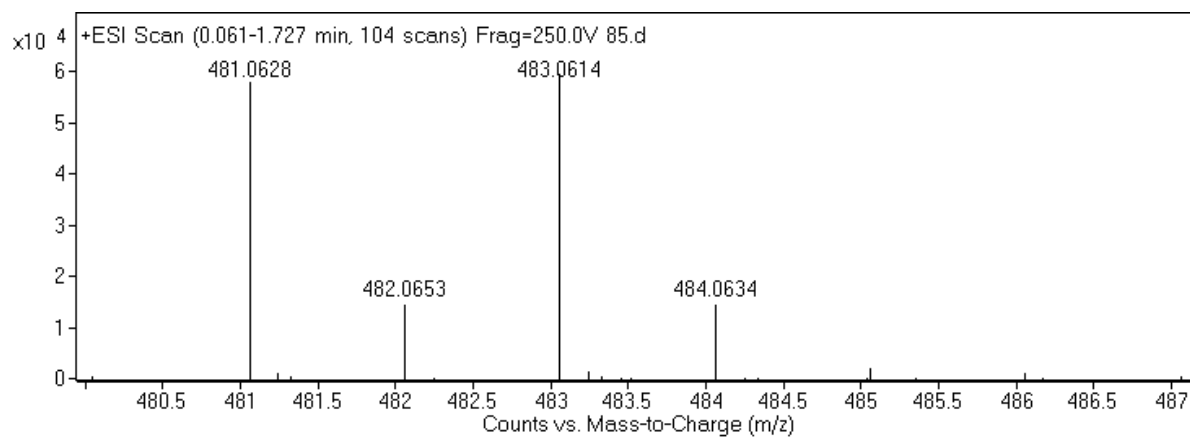

**Figure S13.** ESI-HRMS of Compound 3

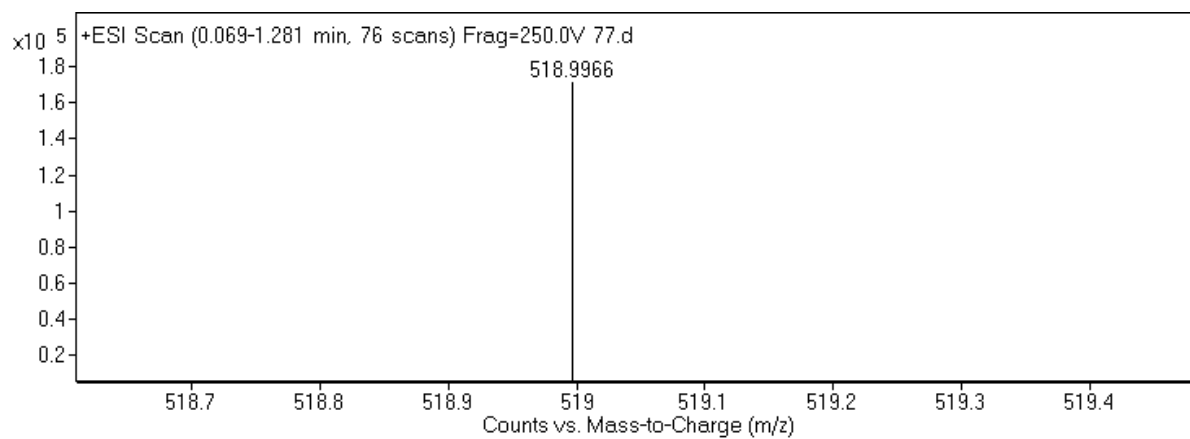

**Figure S14.** ESI-HRMS of Compound 6

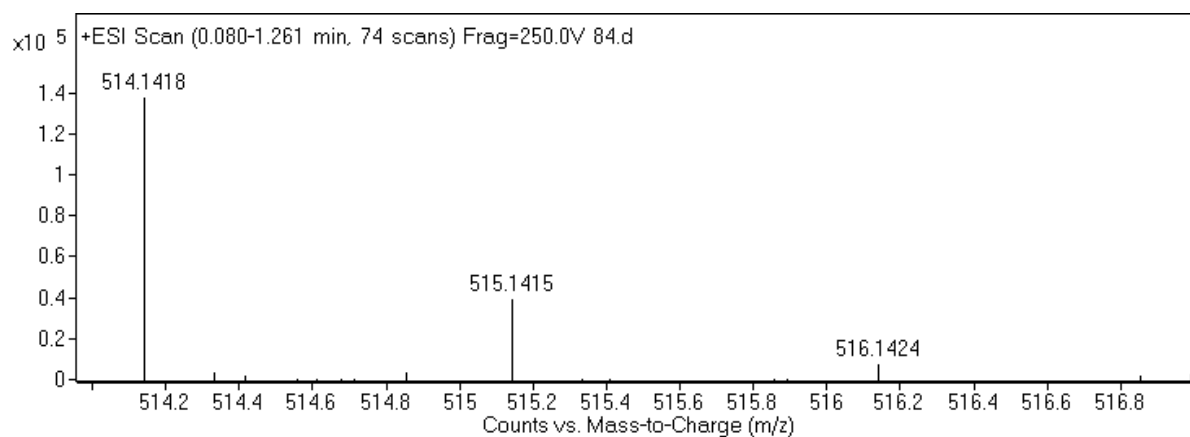

**Figure S15.** ESI-HRMS of Compound 7

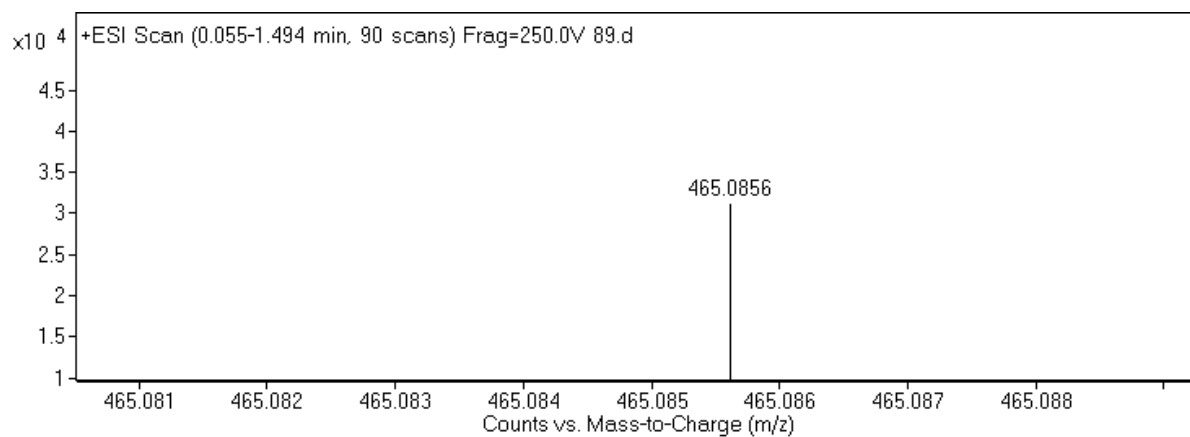

**Figure S16.** ESI-HRMS of Compound 8

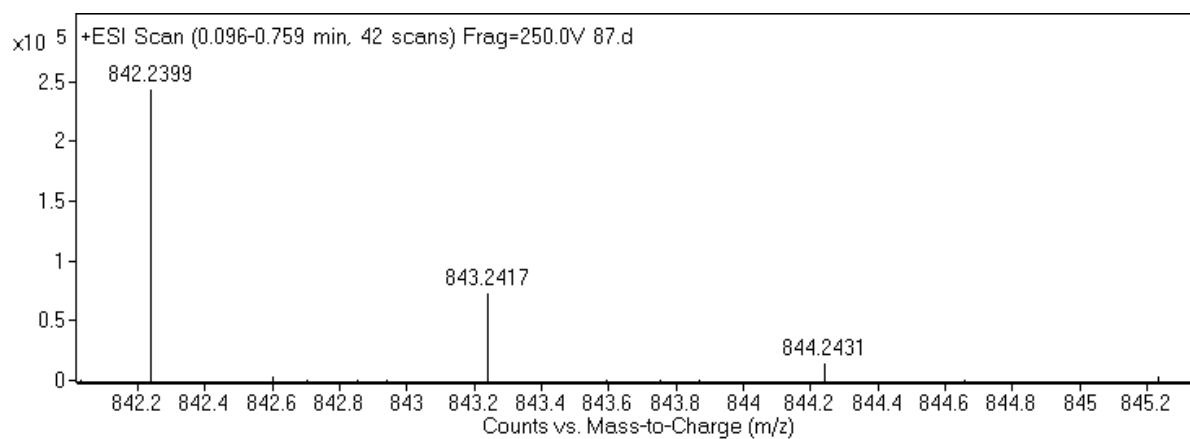

**Figure S17.** ESI-HRMS of Compound 9

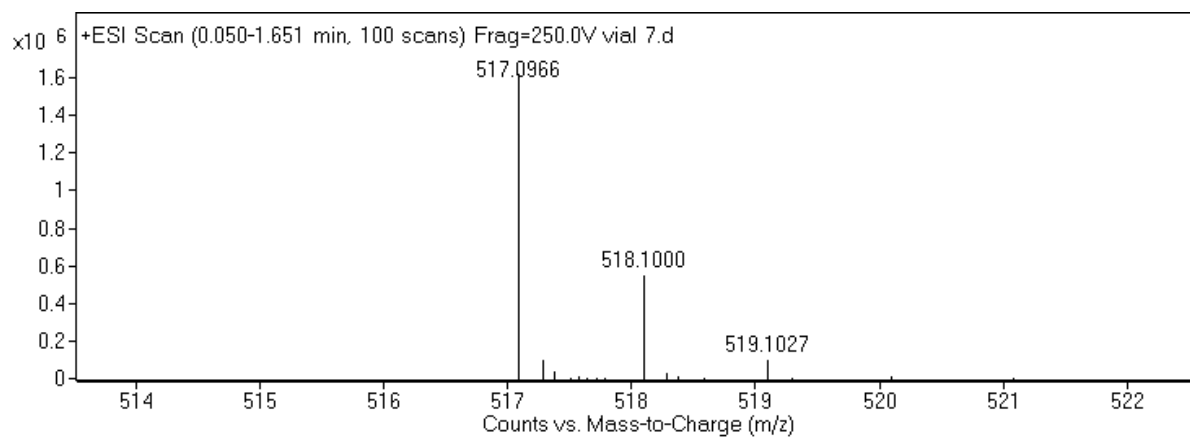

**Figure S18.** ESI-HRMS of Compound 10

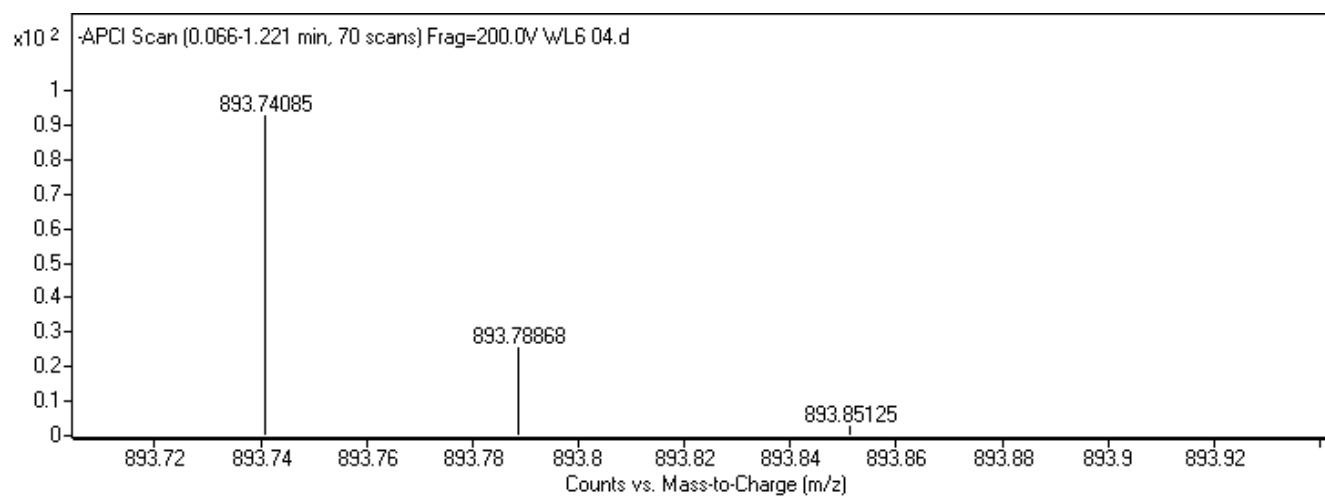

**Figure S19.** ESI-HRMS of Compound 11



a.

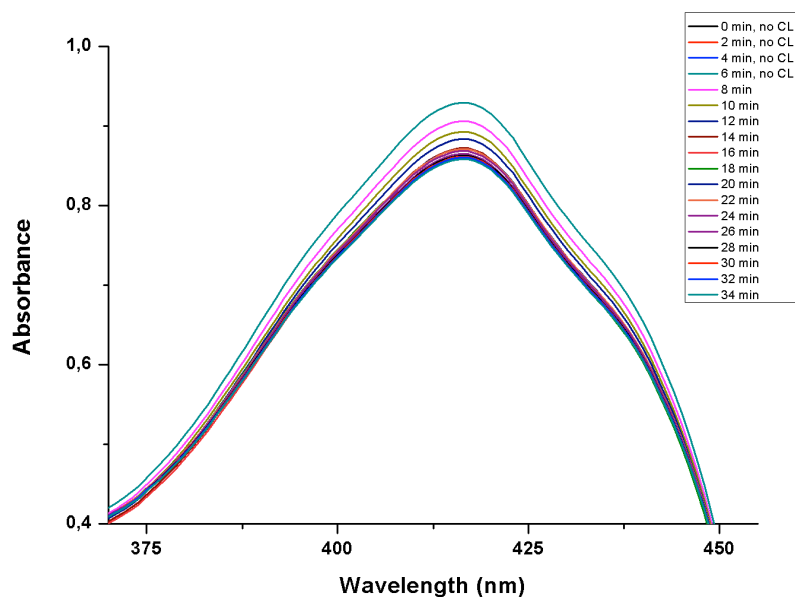

b.

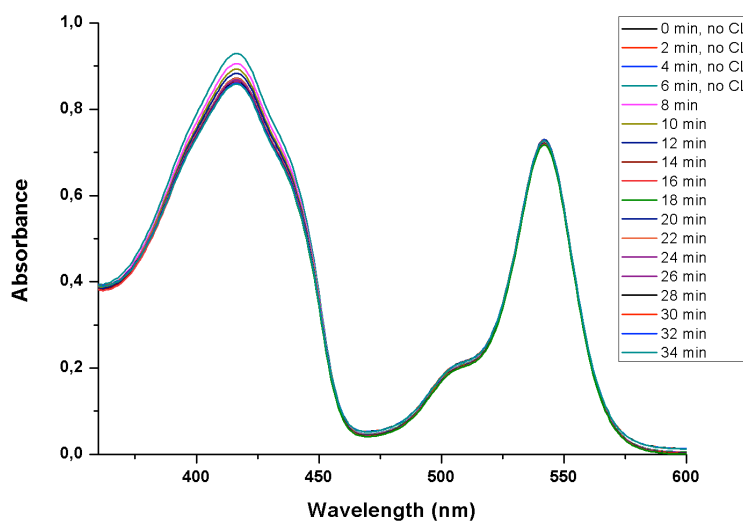

**Figure S20.** Bleaching of 47  $\mu\text{M}$  DPBF in DMSO in the presence of 104  $\mu\text{M}$  of compound 11. (Figure S20a) The sample solutions contain 300  $\mu\text{l}$  of pH=10 buffer solution ( $\text{Na}_2\text{CO}_3$  and  $\text{NaHCO}_3$ ). After 6 minutes, chemiluminescence is induced by 300  $\mu\text{l}$  of  $1.5 \times 10^{-3} \text{M}$   $\text{CuSO}_4$  and  $2 \times 10^{-3} \text{M}$   $\text{H}_2\text{O}_2$ . Absorbance was measured in 2 minutes intervals. During bleaching of DPBF, no change is observed in absorption spectrum of compound 11. (Figure S20b)

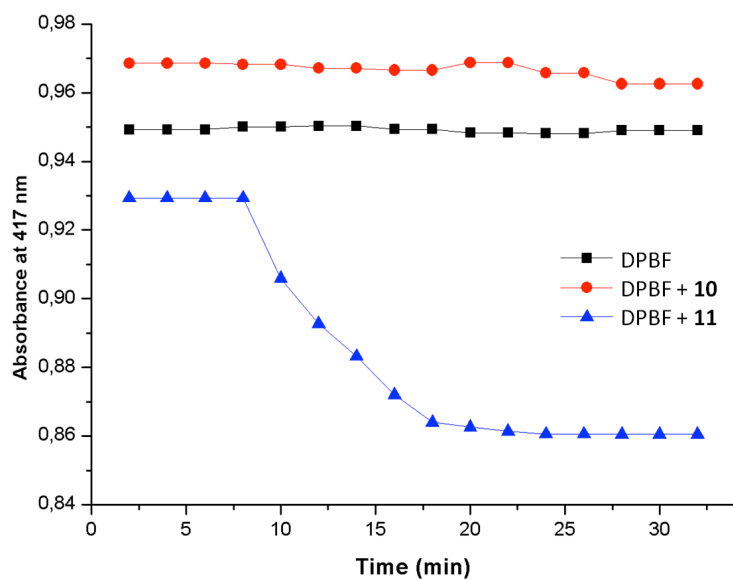

**Figure S21.** Absorbance of DPBF in DMSO at 417 nm without compound 11 or 10 (square), in the presence of compound 10 (circle), in the presence of compound 11 (triangle).

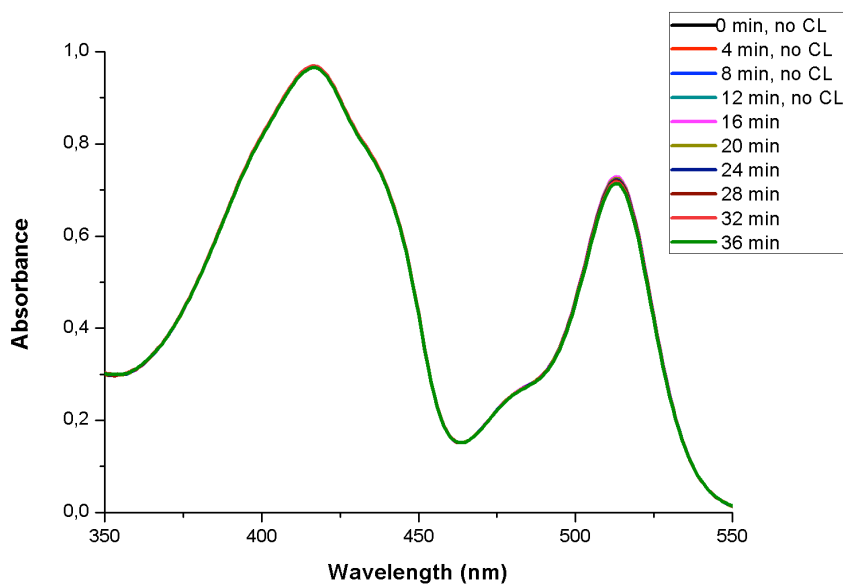

**Figure S22.** Bleaching of 47  $\mu\text{M}$  DPBF in DMSO in the presence of 104  $\mu\text{M}$  of compound 10. The sample solutions contain 300  $\mu\text{l}$  of pH=10 buffer solution ( $\text{Na}_2\text{CO}_3$  and  $\text{NaHCO}_3$ ). After 12 minutes, chemiluminescence is induced by 300  $\mu\text{l}$  of  $1.5 \times 10^{-3} \text{M}$   $\text{CuSO}_4$  and  $2 \times 10^{-3} \text{M}$   $\text{H}_2\text{O}_2$ . Absorbance was measured in 4 minutes intervals.

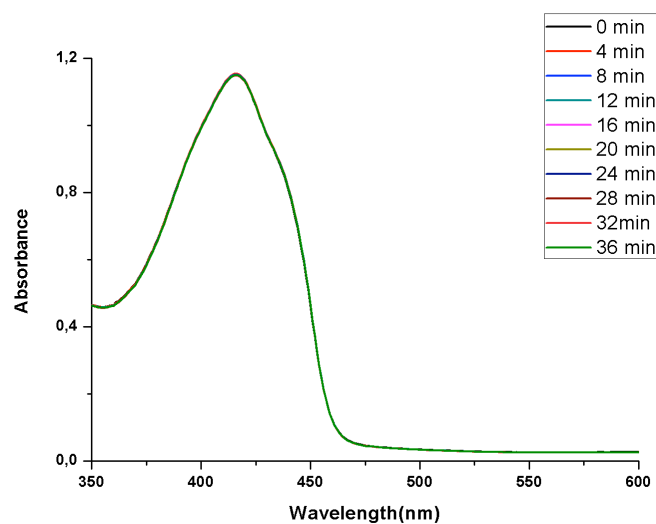

**Figure S23.** Absorbance of 47  $\mu\text{M}$  DPBF in DMSO. The sample solutions contain 300  $\mu\text{l}$  of pH=10 buffer solution ( $\text{Na}_2\text{CO}_3$  and  $\text{NaHCO}_3$ ) and 300  $\mu\text{l}$  of  $1.5 \times 10^{-3} \text{M}$   $\text{CuSO}_4$  and  $2 \times 10^{-3} \text{M}$   $\text{H}_2\text{O}_2$ . Absorbance was measured in 4 minutes intervals.

**a.**

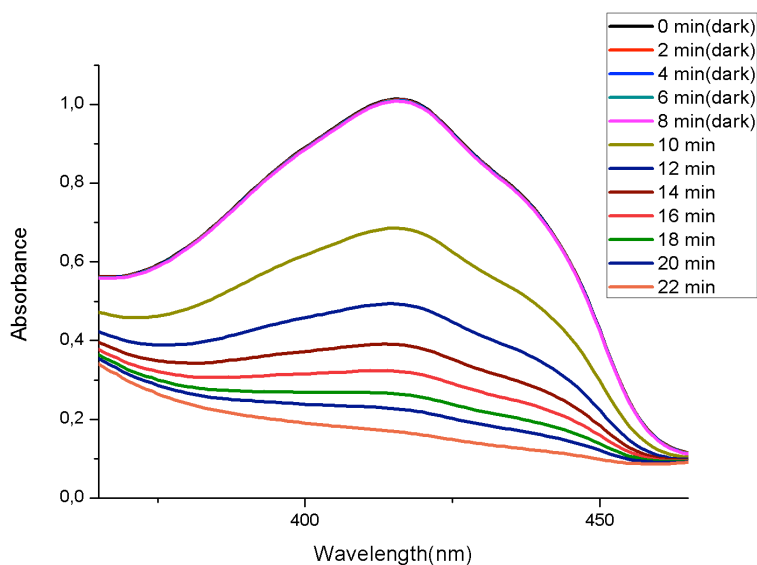

**b.**

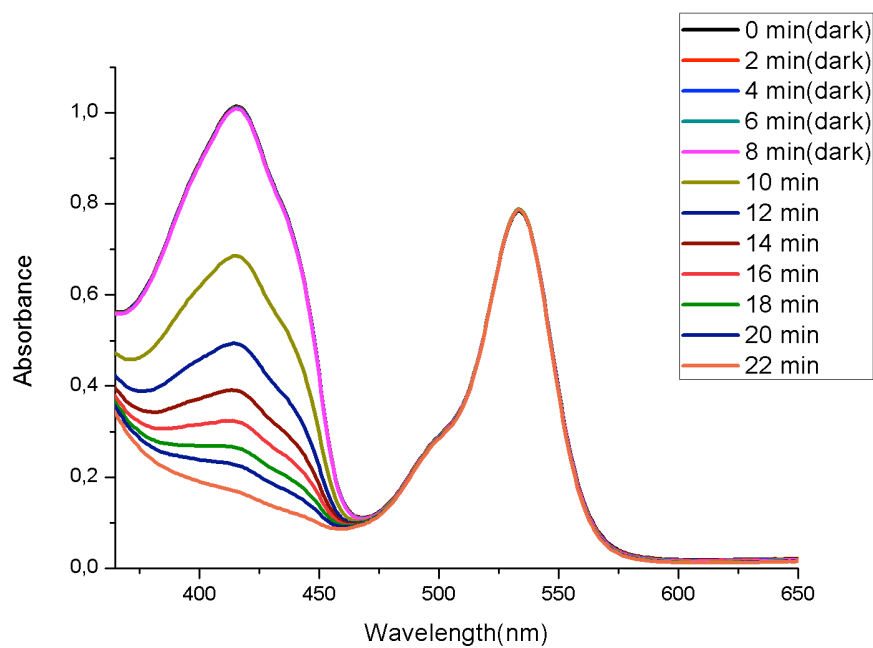

**Figure S24.** Bleaching of 47  $\mu\text{M}$  DPBF in DMSO in the presence of compound 11. (Figure S24a) For the first 8 minutes sample was kept at dark, then irradiated with 530 nm light for 16 minutes. Absorbance was measured in 2 minutes intervals. During bleaching of DPBF, no change is observed in absorption spectrum of compound 11. (Figure S24 b)

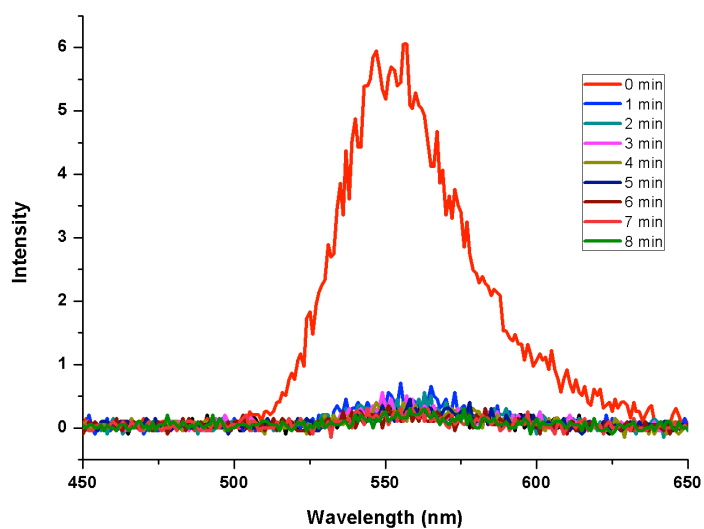

**Figure S25.** Chemiluminescence intensity of compound 10. Intensity was measured in 1 minute intervals.

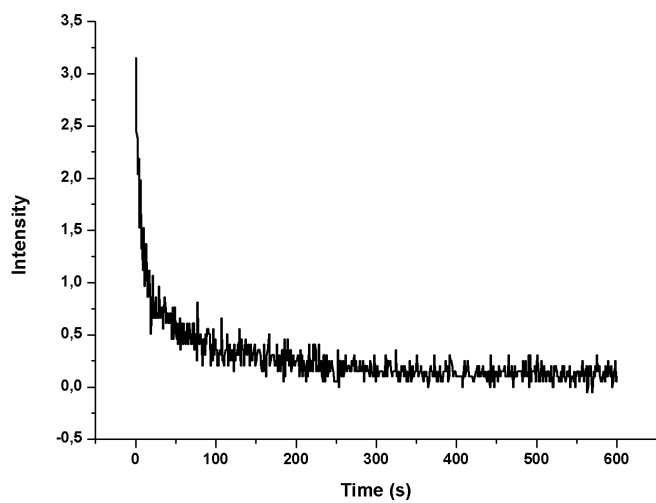

**Figure S26.** Chemiluminescence intensity decay curve of compound 10. Intensity was measured in 1 minute intervals.
